# Supplementary material
Source: PubMed Central journal article supplement (PMC5580821)
Supplement: NIHMS900161-supplement-Supplemental_Material_2.pdf [file NIHMS900161-supplement-Supplemental_Material_2.pdf]

| <b>Supplementary Table 1. Whole-exome sequencing and identification of candidate variants in patient 2</b> |                                              |
|------------------------------------------------------------------------------------------------------------|----------------------------------------------|
| Total number of reads                                                                                      | 75,285,819                                   |
| Sample coverage                                                                                            |                                              |
| 2x coverage                                                                                                | 97.0%                                        |
| 10x coverage                                                                                               | 86.4%                                        |
| 20x coverage                                                                                               | 74.5%                                        |
| 30x coverage                                                                                               | 65.2%                                        |
| Number of variants                                                                                         |                                              |
| Total variants                                                                                             | 56,901                                       |
| Exonic variants                                                                                            | 23,061                                       |
| Functional variants <sup>a</sup>                                                                           | 10,983                                       |
| MAF <0.5% in EVS                                                                                           | 2,442                                        |
| <5 pedigrees in GEM.app                                                                                    | 204                                          |
| In known CMT-related genes                                                                                 | 4 – <i>NEFL</i> , <i>DST</i> , <i>SH3TC2</i> |
| Zygosity consistent with inheritance                                                                       | 2 – <i>NEFL</i> , <i>DST</i>                 |
| Known pathogenic mutations and consistent with phenotype                                                   | 1 – <i>NEFL</i>                              |

(a) Non-synonymous, splice-site and coding indel variants. CMT: Charcot-Marie-Tooth disease. EVS: Exome Variant Server (<http://evs.gs.washington.edu/EVS/>). GEM.app: GENomes management application (<https://genomics.med.miami.edu/>). MAF: minor allele frequency.
