# Supplementary material
Source: PubMed Central journal article supplement (PMC5580821)
Supplement: NIHMS900161-supplement-Supplemental_Material_3.pdf [file NIHMS900161-supplement-Supplemental_Material_3.pdf]

Supplementary Table 3. NEFL mutations

| rs ID       | gDNA change (chr8; hg19)            | cDNA change       | Amino acid change  | Abbreviation | PhyloP | GERP | Grantham score | SIFT      | PolyPhen2 | CADD | MAF ExAC | >1 variants in amino acid | Co-segregation analysis | Reported in >1 pedigree | Functional studies <sup>b</sup> |
|-------------|-------------------------------------|-------------------|--------------------|--------------|--------|------|----------------|-----------|-----------|------|----------|---------------------------|-------------------------|-------------------------|---------------------------------|
| rs61491953  | 24814007G>A                         | c.23C>T           | p.Pro8Leu          | P8L          | 2.40   | 5.59 | 98             | 0.008 (D) | 0.777 (P) | 22.5 | -        | Yes                       | Yes <sup>a</sup>        | Yes                     | Yes <sup>1</sup>                |
| rs61491953  | 24814007G>T                         | c.23C>A           | p.Pro8Gln          | P8Q          | 2.40   | 5.59 | 76             | 0.056 (D) | 0.901 (P) | 22.7 | -        | Yes                       | -                       | -                       | Yes <sup>1</sup>                |
| rs61491953  | 24814007G>C                         | c.23C>G           | p.Pro8Arg          | P8R          | 2.40   | 5.59 | 103            | 0.004 (D) | 0.901 (P) | 22.5 | -        | Yes                       | Yes                     | Yes                     | Yes <sup>2-8</sup>              |
| rs60261494  | 24814007_24814008del GGinsCT        | c.22_23delCCinsAG | p.Pro8Arg          | P8R          | 2.85   | 5.59 | 103            | 0.004 (D) | 0.901 (P) | 18.8 | -        | Yes                       | Yes                     | -                       | -                               |
| rs58640772  | 24813970_24813982dup CTCACGTAGCGC   | c.48_60dup        | p.Thr21Alafs*83    | T21Afs*83    | 1.69   | 4.06 | -              | -         | -         | 20.8 | -        | -                         | -                       | -                       | Yes <sup>9</sup>                |
| rs28928910  | 24813966G>A                         | c.64C>T           | p.Pro22Ser         | P22S         | 1.18   | 5.27 | 74             | 0.095 (T) | 0.137 (T) | 22.3 | -        | Yes                       | Yes                     | Yes                     | Yes <sup>3,10-12</sup>          |
| rs28928910  | 24813966G>T                         | c.64C>A           | p.Pro22Thr         | P22T         | 1.18   | 5.27 | 38             | 0.082 (T) | 0.628 (P) | 22.4 | -        | Yes                       | Yes                     | Yes                     | Yes <sup>3,11</sup>             |
| rs267607538 | 24813965G>C                         | c.65C>G           | p.Pro22Arg         | P22R         | 2.73   | 5.27 | 103            | 0.001 (D) | 0.912 (D) | 22.5 | -        | Yes                       | Yes                     | -                       | -                               |
| rs58332872  | 24813762C>T                         | c.268G>A          | p.Glu90Lys         | E90K         | 5.91   | 5.27 | 56             | 0.000 (D) | 0.980 (D) | 23.0 | -        | -                         | Yes <sup>a</sup>        | Yes                     | Yes <sup>1</sup>                |
| rs62636505  | 24813749A>G                         | c.281T>C          | p.Leu94Pro         | L94P         | 4.93   | 5.27 | 98             | 0.000 (D) | 0.999 (D) | 22.8 | -        | -                         | Yes                     | -                       | -                               |
| rs58982919  | 24813737T>C                         | c.293A>G          | p.Asn98Ser         | N98S         | 4.93   | 5.27 | 46             | 0.000 (D) | 1.000 (D) | 22.7 | -        | Yes                       | Yes <sup>a</sup>        | Yes                     | Yes <sup>1,13,14</sup>          |
| -           | 24813737T>G                         | c.293A>C          | p.Asn98Thr         | N98T         | 4.93   | 5.27 | 65             | 0.000 (D) | 1.000 (D) | 22.8 | -        | Yes                       | -                       | -                       | -                               |
| rs121913663 | 24813612C>A                         | c.418G>T          | p.Glu140*          | E140*        | 4.36   | 5.54 | -              | -         | -         | 23.0 | -        | -                         | -                       | -                       | -                               |
| rs59101996  | 24813584G>A                         | c.446C>T          | p.Ala149Val        | A149V        | 4.44   | 5.54 | 64             | 0.104 (T) | 0.835 (P) | 22.8 | -        | -                         | -                       | -                       | Yes <sup>15</sup>               |
| -           | 24813474C>A                         | c.556G>T          | p.Glu186*          | E186*        | 4.44   | 4.72 | -              | -         | -         | 22.8 | -        | -                         | -                       | -                       | -                               |
| rs199422214 | 24813402C>A                         | c.628G>T          | p.Glu210*          | E210*        | 6.15   | 5.69 | -              | -         | -         | 23.0 | -        | -                         | Yes                     | -                       | Yes <sup>16</sup>               |
| rs587777880 | 24813236T>C                         | c.794A>G          | p.Tyr265Cys        | Y265C        | 5.03   | 5.62 | 194            | 0.000 (D) | 1.000 (D) | 22.7 | -        | -                         | Yes                     | -                       | -                               |
| rs62636502  | 24813227A>C                         | c.803T>G          | p.Leu268Arg        | L268R        | 5.03   | 5.62 | 102            | 0.002 (D) | 0.998 (D) | 22.6 | -        | Yes                       | Yes                     | -                       | -                               |
| rs62636502  | 24813227A>G                         | c.803T>C          | p.Leu268Pro        | L268P        | 5.03   | 5.62 | 98             | 0.003 (D) | 0.998 (D) | 22.8 | -        | Yes                       | Yes                     | Yes                     | -                               |
| -           | 24813098A>G                         | c.932T>C          | p.Leu311Pro        | L311P        | 1.95   | 5.58 | 98             | 0.021 (D) | 0.934 (D) | 22.5 | -        | -                         | -                       | -                       | -                               |
| rs267607537 | 24813053_24813067del TTCATGCCCGGCAT | c.963_977del      | p.Cys322_Asn326del | C322_N326del | 2.23   | 3.77 | -              | -         | -         | 21.4 | -        | -                         | Yes                     | -                       | -                               |
| rs59443585  | 24813035T>G                         | c.995A>C          | p.Gln332Pro        | Q332P        | 4.85   | 5.10 | 76             | 0.000 (D) | 0.992 (D) | 22.7 | -        | -                         | Yes                     | Yes                     | Yes <sup>2-8</sup>              |
| rs60930717  | 24813032A>G                         | c.998T>C          | p.Leu333Pro        | L333P        | 4.85   | 5.10 | 98             | 0.000 (D) | 0.992 (D) | 22.7 | -        | -                         | -                       | -                       | -                               |
| rs281865140 | 24813029T>G                         | c.1001A>C         | p.Gln334Pro        | Q334P        | 2.41   | 3.93 | 76             | 0.011 (D) | 0.904 (P) | 22.4 | -        | -                         | -                       | -                       | -                               |
| rs587777881 | 24813023A>G                         | c.1007T>C         | p.Leu336Pro        | L336P        | 4.85   | 5.10 | 98             | 0.002 (D) | 0.956 (D) | 22.7 | -        | -                         | -                       | -                       | -                               |
| -           | 24811714T>A                         | c.1150A>T         | p.Ile384Phe        | I384F        | 5.08   | 5.58 | 21             | 0.000 (D) | 0.999 (D) | 22.7 | -        | -                         | Yes                     | -                       | -                               |
| -           | 24811698T>C                         | c.1166A>G         | p.Tyr389Cys        | Y389C        | 5.08   | 5.78 | 194            | 0.024 (D) | 1.000 (D) | 22.3 | -        | -                         | Yes                     | -                       | -                               |
| rs62636503  | 24811293C>T                         | c.1186G>A         | p.Glu396Lys        | E396K        | 6.10   | 5.91 | 56             | 0.000 (D) | 1.000 (D) | 22.7 | -        | -                         | Yes                     | Yes                     | Yes <sup>17,18</sup>            |
| -           | 24811218G>A                         | c.1261C>T         | p.Arg421*          | R421*        | 0.61   | 3.08 | -              | -         | -         | 21.5 | -        | -                         | -                       | -                       | -                               |
| rs199775873 | 24811164A>T                         | c.1315T>A         | p.Phe439Ile        | F439I        | 2.57   | 5.91 | 21             | 0.138 (T) | 0.666 (P) | 21.0 | 0.011    | -                         | -                       | -                       | -                               |
| rs587777882 | 24811160G>A                         | c.1319C>T         | p.Pro440Leu        | P440L        | 1.98   | 5.02 | 98             | 0.002 (D) | 0.551 (P) | 21.4 | -        | -                         | Yes                     | Yes                     | -                               |

(a) Confirmed *de novo* mutations. (b) *In vitro* or *in vivo* functional studies. CADD = CADD score (<http://cadd.gs.washington.edu/>). D = damaging/probably damaging. ExAC = Exome Aggregation Consortium browser v0.3 (<http://exac.broadinstitute.org>). GERP = GERP score accessed through the UCSC Genome Browser (<https://genome.ucsc.edu/cgi-bin/hgGateway>). hg19 = human reference genome assembly 19 (GRCh37). MAF = minor allele frequency. P = possibly damaging. phyloP = 46 vertebrate basewise conservation phyloP score accessed through the UCSC Genome Browser (<https://genome.ucsc.edu/cgi-bin/hgGateway>). PolyPhen2 = PolyPhen2 score (<http://genetics.bwh.harvard.edu/pph2/>). rs ID = reference single nucleotide polymorphism identifier at dbSNP. SIFT = SIFT score (<http://provean.jcvi.org/index.php>). T = tolerated/benign.

## REFERENCES

1. Perez-Olle R, Jones ST, Liem RK. Phenotypic analysis of neurofilament light gene mutations linked to Charcot-Marie-Tooth disease in cell culture models. *Hum Mol Genet* 2004;**13**:2207-20.
2. Zhai J, Lin H, Julien JP, Schlaepfer WW. Disruption of neurofilament network with aggregation of light neurofilament protein: a common pathway leading to motor neuron degeneration due to Charcot-Marie-Tooth disease-linked mutations in NFL and HSPB1. *Hum Mol Genet* 2007;**16**:3103-16.
3. Perez-Olle R, Lopez-Toledano MA, Goryunov D, *et al.* Mutations in the neurofilament light gene linked to Charcot-Marie-Tooth disease cause defects in transport. *J Neurochem* 2005;**93**:861-74.
4. Perez-Olle R, Leung CL, Liem RK. Effects of Charcot-Marie-Tooth-linked mutations of the neurofilament light subunit on intermediate filament formation. *J Cell Sci* 2002;**115**:4937-46.
5. Brownlees J, Ackerley S, Grierson AJ, *et al.* Charcot-Marie-Tooth disease neurofilament mutations disrupt neurofilament assembly and axonal transport. *Hum Mol Genet* 2002;**11**:2837-44.
6. Gentil BJ, Mushynski WE, Durham HD. Heterogeneity in the properties of NEFL mutants causing Charcot-Marie-Tooth disease results in differential effects on neurofilament assembly and susceptibility to intervention by the chaperone-inducer, celastrol. *Int J Biochem Cell Biol* 2013;**45**:1499-508.
7. Tradewell ML, Durham HD, Mushynski WE, Gentil BJ. Mitochondrial and axonal abnormalities precede disruption of the neurofilament network in a model of charcot-marie-tooth disease type 2E and are prevented by heat shock proteins in a mutant-specific fashion. *J Neuropathol Exp Neurol* 2009;**68**:642-52.
8. Gentil BJ, Minotti S, Beange M, Baloh RH, Julien JP, Durham HD. Normal role of the low-molecular-weight neurofilament protein in mitochondrial dynamics and disruption in Charcot-Marie-Tooth disease. *FASEB J* 2012;**26**:1194-203.
9. Leung CL, Nagan N, Graham TH, Liem RK. A novel duplication/insertion mutation of NEFL in a patient with Charcot-Marie-Tooth disease. *Am J Med Genet A* 2006;**140**:1021-5.
10. Filali M, Dequen F, Lalonde R, Julien JP. Sensorimotor and cognitive function of a NEFL(P22S) mutant model of Charcot-Marie-Tooth disease type 2E. *Behav Brain Res* 2011;**219**:175-80.
11. Sasaki T, Gotow T, Shiozaki M, *et al.* Aggregate formation and phosphorylation of neurofilament-L Pro22 Charcot-Marie-Tooth disease mutants. *Hum Mol Genet* 2006;**15**:943-52.
12. Dequen F, Filali M, Lariviere RC, Perrot R, Hisanaga S, Julien JP. Reversal of neuropathy phenotypes in conditional mouse model of Charcot-Marie-Tooth disease type 2E. *Hum Mol Genet* 2010;**19**:2616-29.
13. Saporta MA, Dang V, Volfson D, *et al.* Axonal Charcot-Marie-Tooth disease patient-derived motor neurons demonstrate disease-specific phenotypes including abnormal electrophysiological properties. *Exp Neurol* 2015;**263**:190-9.
14. Adebola AA, Di Castri T, He CZ, *et al.* Neurofilament light polypeptide gene N98S mutation in mice leads to neurofilament network abnormalities and a Charcot-Marie-Tooth Type 2E phenotype. *Hum Mol Genet* 2015;**24**:2163-74.
15. Lee IB, Kim SK, Chung SH, *et al.* The effect of rod domain A148V mutation of neurofilament light chain on filament formation. *BMB Rep* 2008;**41**:868-74.
16. Yum SW, Zhang J, Mo K, Li J, Scherer SS. A novel recessive Nefl mutation causes a severe, early-onset axonal neuropathy. *Ann Neurol* 2009;**66**:759-70.
17. Dale JM, Villalon E, Shannon SG, *et al.* Expressing hNF-LE397K results in abnormal gaiting in a transgenic model of CMT2E. *Genes Brain Behav* 2012;**11**:360-5.
18. Shen H, Barry DM, Dale JM, Garcia VB, Calcutt NA, Garcia ML. Muscle pathology without severe nerve pathology in a new mouse model of Charcot-Marie-Tooth disease type 2E. *Hum Mol Genet* 2011;**20**:2535-48.
