# Supplementary material
Source: PubMed Central journal article supplement (PMC5580821)
Supplement: NIHMS900161-supplement-Supplemental_Material_4.pdf [file NIHMS900161-supplement-Supplemental_Material_4.pdf]

**Supplementary Table 4.** Classification of reported *NEFL* mutations according to ACMG/AMP standards and guidelines for the interpretation of sequence variants<sup>1</sup>

| cDNA change       | Amino acid change  | Variant category <sup>a</sup> |     |     |                  |     |                  |     |     |     |     |     |                       |                       |     |     |     |     |     | Variant classification <sup>a</sup> |
|-------------------|--------------------|-------------------------------|-----|-----|------------------|-----|------------------|-----|-----|-----|-----|-----|-----------------------|-----------------------|-----|-----|-----|-----|-----|-------------------------------------|
|                   |                    | PVS1                          | PS1 | PS2 | PS3 <sup>b</sup> | PS4 | PM1 <sup>c</sup> | PM2 | PM3 | PM4 | PM5 | PM6 | PS4 mod. <sup>d</sup> | PP1 mod. <sup>e</sup> | PP1 | PP2 | PP3 | PP4 | PP5 |                                     |
| c.23C>T           | p.Pro8Leu          |                               |     | +9  | +                |     | +                | +   |     |     |     |     | +                     |                       |     |     | +   |     |     | Pathogenic                          |
| c.23C>A           | p.Pro8Gln          |                               |     |     | +                |     | +                | +   |     |     |     |     | +                     |                       |     |     |     | +   |     | Pathogenic                          |
| c.23C>G           | p.Pro8Arg          |                               |     |     | +                |     | +                | +   |     |     |     |     | +                     | +                     | +   |     |     | +   |     | Pathogenic                          |
| c.22_23delCCinsAG | p.Pro8Arg          |                               | +   |     |                  |     | +                | +   |     |     |     |     |                       |                       |     | +   |     | +   |     | Pathogenic                          |
| c.48_60dup        | p.Thr21Alafs*83    |                               |     |     | +                |     | +                | +   |     |     |     |     |                       |                       |     |     |     | +   |     | Likely pathogenic                   |
| c.64C>T           | p.Pro22Ser         |                               |     |     | +                |     | +                | +   |     |     |     |     | +                     | +                     |     |     |     |     |     | Pathogenic                          |
| c.64C>A           | p.Pro22Thr         |                               |     |     | +                |     | +                | +   |     |     |     |     | +                     |                       |     | +   |     |     |     | Pathogenic                          |
| c.65C>G           | p.Pro22Arg         |                               |     |     |                  |     | +                | +   |     |     |     |     | +                     |                       |     | +   |     | +   |     | Likely pathogenic                   |
| c.268G>A          | p.Glu90Lys         |                               |     | +9  | +                |     | +                | +   |     |     |     |     | +                     |                       |     |     |     | +   |     | Pathogenic                          |
| c.281T>C          | p.Leu94Pro         |                               |     |     |                  |     | +                | +   |     |     |     |     |                       |                       |     | +   |     | +   |     | Likely pathogenic                   |
| c.293A>G          | p.Asn98Ser         |                               |     | +   | +                |     | +                | +   |     |     |     |     | +                     |                       |     |     |     | +   |     | Pathogenic                          |
| c.293A>C          | p.Asn98Thr         |                               |     |     |                  |     | +                | +   |     |     |     |     | +                     |                       |     |     |     | +   |     | Likely pathogenic                   |
| c.418G>T          | p.Glu140*          | +                             |     |     |                  |     |                  | +   |     |     |     |     |                       |                       |     |     |     | +   |     | Pathogenic                          |
| c.446C>T          | p.Ala149Val        |                               |     |     | +                |     |                  | +   |     |     |     |     |                       |                       |     |     |     |     |     | Likely pathogenic                   |
| c.556G>T          | p.Glu186*          | f                             |     |     |                  |     |                  | +   |     |     |     |     |                       |                       |     |     |     | +   |     | Uncertain significance              |
| c.628G>T          | p.Glu210*          | +                             |     |     | +                |     |                  | +   |     |     |     |     |                       |                       |     | +   |     | +   |     | Pathogenic                          |
| c.794A>G          | p.Tyr265Cys        |                               |     |     |                  |     |                  | +   |     |     |     |     |                       |                       |     | +   |     | +   |     | Uncertain significance              |
| c.803T>G          | p.Leu268Arg        |                               |     |     |                  |     |                  | +   |     |     |     |     |                       |                       |     | +   |     | +   |     | Uncertain significance              |
| c.803T>C          | p.Leu268Pro        |                               |     |     |                  |     |                  | +   |     |     |     |     | +                     |                       | +   |     | +   | +   |     | Likely pathogenic                   |
| c.932T>C          | p.Leu311Pro        |                               |     |     |                  |     |                  | +   |     |     |     |     |                       |                       |     |     |     | +   |     | Uncertain significance              |
| c.963_977del      | p.Cys322_Asn326del |                               |     |     |                  |     |                  | +   |     | +   |     |     |                       |                       |     | +   |     | +   |     | Likely pathogenic                   |
| c.995A>C          | p.Gln332Pro        |                               |     |     | +                |     |                  | +   |     |     |     |     | +                     |                       | +   |     |     | +   |     | Pathogenic                          |
| c.998T>C          | p.Leu333Pro        |                               |     |     |                  |     |                  | +   |     |     |     |     |                       |                       |     |     |     | +   |     | Uncertain significance              |
| c.1001A>C         | p.Gln334Pro        |                               |     |     |                  |     |                  | +   |     |     |     |     |                       |                       |     |     |     | +   |     | Uncertain significance              |
| c.1007T>C         | p.Leu336Pro        |                               |     |     |                  |     |                  | +   |     |     |     |     |                       |                       |     |     |     | +   |     | Uncertain significance              |
| c.1150A>T         | p.Ile384Phe        |                               |     |     |                  |     | +                | +   |     |     |     |     |                       |                       |     | +   |     | +   |     | Likely pathogenic                   |
| c.1166A>G         | p.Tyr389Cys        |                               |     |     |                  |     | +                | +   |     |     |     |     |                       |                       |     | +   |     | +   |     | Likely pathogenic                   |
| c.1186G>A         | p.Glu396Lys        |                               |     |     | +                |     | +                | +   |     |     |     |     | +                     | +                     |     |     |     | +   |     | Pathogenic                          |
| c.1261C>T         | p.Arg421*          | f                             |     |     |                  |     |                  | +   |     |     |     |     |                       |                       |     |     |     | +   |     | Uncertain significance <sup>1</sup> |
| c.1315T>A         | p.Phe439Ile        |                               |     |     |                  |     |                  |     |     |     |     |     |                       |                       |     |     |     |     |     | Uncertain significance              |
| c.1319C>T         | p.Pro440Leu        |                               |     |     |                  |     |                  | +   |     |     |     |     | +                     |                       | +   |     | +   | +   |     | Likely pathogenic                   |

(a) See reference 1 for category definitions and classification criteria. (b) *In vitro* or *in vivo* functional studies; see supplementary table 3 for references. (c) Variant located within a proposed mutational hotspot; see main text and figure 4 for details. (d) PS4 moderate: variant observed in two or more unrelated patients and absent in controls. (e) PP1 moderate. (f) Nonsense variants are not a clearly established mechanism of pathogenicity of autosomal dominant *NEFL*-related Charcot-Marie-Tooth disease (CMT); e.g., heterozygous carriers of p.Glu210\* are asymptomatic,<sup>2</sup> p.Glu210\* does not have a dominant-negative effect *in vitro*,<sup>2</sup> and there is no detailed information available about patients with CMT due to p.Glu186\* and p.Arg421\*.<sup>3</sup> (g) Reported as confirmed paternity.

## REFERENCE

1. Richards S, Aziz N, Bale S, *et al.* Standards and guidelines for the interpretation of sequence variants: a joint consensus recommendation of the American College of Medical Genetics and Genomics and the Association for Molecular Pathology. *Genet Med* 2015;**17**:405-24.
2. Yum SW, Zhang J, Mo K, Li J, Scherer SS. A novel recessive Nefl mutation causes a severe, early-onset axonal neuropathy. *Ann Neurol* 2009;**66**:759-70.
3. DiVincenzo C, Elzinga CD, Medeiros AC, *et al.* The allelic spectrum of Charcot-Marie-Tooth disease in over 17,000 individuals with neuropathy. *Mol Genet Genomic Med* 2014;**2**:522-9.
