# Supplementary material
Source: PubMed Central journal article supplement (PMC5580821)
Supplement: NIHMS900161-supplement-Supplemental_Material_5.pdf [file NIHMS900161-supplement-Supplemental_Material_5.pdf]

| <b>Supplementary Table 5.</b> CNS features seen in other Charcot-Marie-Tooth disease subtypes. |                                                 |
|------------------------------------------------------------------------------------------------|-------------------------------------------------|
| <b>CNS feature</b>                                                                             | <b>Charcot-Marie-Tooth disease-related gene</b> |
| Hearing loss                                                                                   | PMP22, MPZ, SH3TC2, NDRG1, INF2                 |
| Pyramidal features                                                                             | MFN2, KIF5A, GDAP1, SPG11, GJB1                 |
| Ataxia (sensory or cerebellar)                                                                 | PMP22, MPZ, PRX, GJB1, MME                      |
